# Supplementary material for: A multimodal neuroimaging study investigating resting-state connectivity, glutamate and GABA at 7 T in first-episode psychosis
Source: PubMed Central journal article supplement — J Psychiatry Neurosci. 2021 Dec 21;46(6):E702–10. doi: 10.1503/jpn.210107 (PMC8695527; doi:10.1503/jpn.210107), 2021-12-21
Supplement: 210107-1-at.pdf [file 210107-1-at.pdf]

Appendix 1 to Overbeek G, Gawne TJ, Reid MA, et al. A multimodal neuroimaging study investigating resting-state connectivity, glutamate and GABA at 7 T in first-episode psychosis. *J Psychiatry Neurosci* 2021.

doi: 10.1503/jpn.210107

Copyright © 2021 The Author(s) or their employer(s).

To receive this resource in an accessible format, please contact us at [cmajgroup@cmaj.ca](mailto:cmajgroup@cmaj.ca).

Online appendices are unedited and posted as supplied by the authors.

## **SUPPLEMENTAL MATERIAL**

**Table S1:** Areas with a significant dorsal anterior cingulate cortex (dACC) connectivity in healthy controls

**Table S2:** Areas with a significant dorsal anterior cingulate cortex (dACC) connectivity in first episode psychosis patients

**Table S3:** Differences in dorsal anterior cingulate cortex (dACC) connectivity between healthy controls and first-episode psychosis patients.

**Table S4:** Relationship between dorsal anterior cingulate cortex (dACC) connectivity and neurochemical levels in healthy controls

**Table S5:** Relationship between dorsal anterior cingulate cortex (dACC) connectivity and neurochemical levels in first episode psychosis patients

**Table S6:** Differences in the relationship of dorsal anterior cingulate cortex (dACC) connectivity and neurochemicals in healthy controls and first episode psychosis patients

**Figure S1:** Relationship between glutamate and dorsal anterior cingulate cortex (dACC) connectivity in healthy controls

**Figure S2:** Relationship between glutamate and dorsal anterior cingulate cortex (dACC) connectivity in first episode psychosis patients

**Figure S3:** Relationship between  $\gamma$ -aminobutyric acid (GABA) and dorsal anterior cingulate cortex (dACC) connectivity in healthy controls

**Figure S4:** Relationship between  $\gamma$ -aminobutyric acid (GABA) and dorsal anterior cingulate cortex (dACC) connectivity in first episode psychosis patients

Appendix 1 to Overbeek G, Gawne TJ, Reid MA, et al. A multimodal neuroimaging study investigating resting-state connectivity, glutamate and GABA at 7 T in first-episode psychosis. *J Psychiatry Neurosci* 2021.

doi: 10.1503/jpn.210107

Copyright © 2021 The Author(s) or their employer(s).

To receive this resource in an accessible format, please contact us at [cmajgroup@cmaj.ca](mailto:cmajgroup@cmaj.ca).

Online appendices are unedited and posted as supplied by the authors.

**Table S1:** Areas with a significant dorsal anterior cingulate cortex (dACC) connectivity in healthy controls

| Region                       | Hemisphere | x, y, z      | Voxels | Peak t-value |
|------------------------------|------------|--------------|--------|--------------|
| <b>Positive Connectivity</b> |            |              |        |              |
| Cluster 1                    |            | 3, 12, 33    | 113075 | 20.5         |
| Superior Frontal Lobe        | B          |              | 3015   |              |
| Middle Frontal Lobe          | B          |              | 3504   |              |
| Inferior Frontal Lobe        | B          |              | 1663   |              |
| Medial Frontal Lobe          | B          |              | 254    |              |
| Orbital Frontal Lobe         | B          |              | 102    |              |
| Olfactory                    | B          |              | 105    |              |
| Supplementary Motor Area     | B          |              | 6733   |              |
| Paracentral Lobule           | B          |              | 1103   |              |
| Precentral Gyrus             | B          |              | 4624   |              |
| Superior Temporal Lobe       | B          |              | 6134   |              |
| Middle Temporal Lobe         | B          |              | 160    |              |
| Heschl Gyrus                 | B          |              | 1070   |              |
| Fusiform Gyrus               | B          |              | 791    |              |
| Superior Parietal Lobe       | B          |              | 3111   |              |
| Inferior Parietal Lobe       | B          |              | 278    |              |
| Postcentral Gyrus            | B          |              | 5434   |              |
| Supramarginal Gyrus          | B          |              | 4625   |              |
| Precuneus                    | B          |              | 5759   |              |
| Lingual Gyrus                | B          |              | 5554   |              |
| Superior Occipital Lobe      | B          |              | 2182   |              |
| Middle Occipital Lobe        | B          |              | 706    |              |
| Cuneus                       | B          |              | 4806   |              |
| Calcarine                    | B          |              | 4362   |              |
| Anterior Cingulum            | B          |              | 3171   |              |
| Middle Cingulum              | B          |              | 6957   |              |
| Posterior Cingulum           | B          |              | 134    |              |
| Rolandic Operculum           | B          |              | 4586   |              |
| Insula                       | B          |              | 7130   |              |
| Caudate                      | B          |              | 293    |              |
| Putamen                      | B          |              | 2715   |              |
| Pallidum                     | B          |              | 274    |              |
| Thalamus                     | B          |              | 2751   |              |
| Amygdala                     | B          |              | 308    |              |
| Hippocampus                  | B          |              | 68     |              |
| Parahippocampal Gyrus        | B          |              | 185    |              |
| Cerebellum                   | B          |              | 5237   |              |
| Cluster 2                    |            | 35, 44, 24   | 2802   | 8.13         |
| Superior Frontal Lobe        | R          |              | 73     |              |
| Middle Frontal Lobe          | R          |              | 2446   |              |
| <b>Negative Connectivity</b> |            |              |        |              |
| Cluster 1                    |            | -48, -62, 44 | 54278  | 8.77         |

Appendix 1 to Overbeek G, Gawne TJ, Reid MA, et al. A multimodal neuroimaging study investigating resting-state connectivity, glutamate and GABA at 7 T in first-episode psychosis. *J Psychiatry Neurosci* 2021.

doi: 10.1503/jpn.210107

Copyright © 2021 The Author(s) or their employer(s).

To receive this resource in an accessible format, please contact us at [cmajgroup@cmaj.ca](mailto:cmajgroup@cmaj.ca).

Online appendices are unedited and posted as supplied by the authors.

|                          |   |               |      |      |
|--------------------------|---|---------------|------|------|
| Superior Frontal Lobe    | B |               | 6584 |      |
| Middle Frontal Lobe      | B |               | 6273 |      |
| Inferior Frontal Lobe    | B |               | 2004 |      |
| Medial Frontal Lobe      | B |               | 4297 |      |
| Orbital Frontal Lobe     | B |               | 7003 |      |
| Gyrus Rectus             | B |               | 1141 |      |
| Supplementary Motor Area | B |               | 77   |      |
| Precentral Gyrus         | L |               | 65   |      |
| Superior Temporal Lobe   | B |               | 519  |      |
| Middle Temporal Lobe     | B |               | 534  |      |
| Inferior Parietal Lobe   | B |               | 2648 |      |
| Superior Parietal Lobe   | B |               | 682  |      |
| Angular Gyrus            | B |               | 5811 |      |
| Precuneus                | B |               | 2564 |      |
| Superior Occipital Lobe  | B |               | 125  |      |
| Middle Occipital Lobe    | B |               | 922  |      |
| Cuneus                   | B |               | 74   |      |
| Calcarine                | B |               | 64   |      |
| Anterior Cingulum        | R |               | 282  |      |
| Middle Cingulum          | B |               | 815  |      |
| Posterior Cingulum       | B |               | 517  |      |
| Cluster 2                |   | 68, -24, -17  | 4109 | 8.14 |
| Middle Temporal Lobe     | B |               | 2606 |      |
| Inferior Temporal Lobe   | L |               | 1347 |      |
| Cluster 3                |   | -68, 26, -12  | 4846 | 6.91 |
| Middle Temporal Lobe     | B |               | 3398 |      |
| Cluster 4                |   | -24, -84, -26 | 575  | 4.81 |
| Cerebellum               | L |               | 575  |      |

Regions containing >50 voxels are included in table; B, bilateral; L, left; R, right

Appendix 1 to Overbeek G, Gawne TJ, Reid MA, et al. A multimodal neuroimaging study investigating resting-state connectivity, glutamate and GABA at 7 T in first-episode psychosis. *J Psychiatry Neurosci* 2021.

doi: 10.1503/jpn.210107

Copyright © 2021 The Author(s) or their employer(s).

To receive this resource in an accessible format, please contact us at [cmajgroup@cmaj.ca](mailto:cmajgroup@cmaj.ca).

Online appendices are unedited and posted as supplied by the authors.

**Table S2:** Areas with a significant dorsal anterior cingulate (dACC) connectivity in first episode psychosis patients

| Region                       | Hemisphere | x, y, z     | Voxels | Peak t-value |
|------------------------------|------------|-------------|--------|--------------|
| <b>Positive Connectivity</b> |            |             |        |              |
| Cluster 1                    |            | 3, 14, 32   | 124047 | 22.13        |
| Superior Frontal Lobe        | B          |             | 4198   |              |
| Middle Frontal Lobe          | B          |             | 5089   |              |
| Inferior Frontal Lobe        | B          |             | 2801   |              |
| Medial Frontal Lobe          | B          |             | 330    |              |
| Orbital Frontal Lobe         | B          |             | 225    |              |
| Olfactory                    | B          |             | 181    |              |
| Supplementary Motor Area     | B          |             | 7468   |              |
| Paracentral Lobule           | B          |             | 831    |              |
| Precentral Gyrus             | B          |             | 5796   |              |
| Superior Temporal Lobe       | B          |             | 6708   |              |
| Middle Temporal Lobe         | B          |             | 428    |              |
| Heschl Gyrus                 | B          |             | 935    |              |
| Fusiform Gyrus               | B          |             | 320    |              |
| Superior Parietal Lobe       | B          |             | 2310   |              |
| Inferior Parietal Lobe       | B          |             | 1043   |              |
| Postcentral Gyrus            | B          |             | 6510   |              |
| Supramarginal Gyrus          | B          |             | 5680   |              |
| Precuneus                    | B          |             | 6909   |              |
| Superior Occipital Lobe      | B          |             | 1775   |              |
| Cuneus                       | B          |             | 4665   |              |
| Calcarine                    | B          |             | 4512   |              |
| Lingual Gyrus                | B          |             | 4687   |              |
| Anterior Cingulum            | B          |             | 3437   |              |
| Middle Cingulum              | B          |             | 7042   |              |
| Posterior Cingulum           | B          |             | 282    |              |
| Rolandic Operculum           | B          |             | 4482   |              |
| Insula                       | B          |             | 7398   |              |
| Caudate                      | B          |             | 709    |              |
| Putamen                      | B          |             | 3004   |              |
| Pallidum                     | B          |             | 517    |              |
| Thalamus                     | B          |             | 3334   |              |
| Amygdala                     | B          |             | 219    |              |
| Hippocampus                  | B          |             | 136    |              |
| Parahippocampal Gyrus        | B          |             | 72     |              |
| Cerebellum                   | B          |             | 4251   |              |
| Cluster 2                    |            | 33, 434, 23 | 3753   | 4.70         |
| Middle Frontal Lobe          | R          |             | 2944   |              |
| Inferior Frontal Lobe        | R          |             | 122    |              |
| Cluster 3                    |            | 523, -59, 2 | 467    | 4.78         |
| Middle Temporal Lobe         | R          |             | 442    |              |
| <b>Negative Connectivity</b> |            |             |        |              |
| Cluster 1                    |            | 41, 42, -12 | 42296  | 8.94         |
| Superior Frontal Lobe        | B          |             | 4620   |              |
| Middle Frontal Lobe          | B          |             | 4986   |              |

Appendix 1 to Overbeek G, Gawne TJ, Reid MA, et al. A multimodal neuroimaging study investigating resting-state connectivity, glutamate and GABA at 7 T in first-episode psychosis. *J Psychiatry Neurosci* 2021.

doi: 10.1503/jpn.210107

Copyright © 2021 The Author(s) or their employer(s).

To receive this resource in an accessible format, please contact us at [cmajgroup@cmaj.ca](mailto:cmajgroup@cmaj.ca).

Online appendices are unedited and posted as supplied by the authors.

|                                   |   |                |      |       |
|-----------------------------------|---|----------------|------|-------|
| Inferior Frontal Lobe             | B |                | 1243 |       |
| Medial Frontal Lobe               | B |                | 5656 |       |
| Orbital Frontal Lobe              | B |                | 7857 |       |
| Gyrus Rectus                      | B |                | 1776 |       |
| Precentral Gyrus                  | L |                | 187  |       |
| Superior Temporal Lobe            | B |                | 659  |       |
| Middle Temporal Lobe              | B |                | 6303 |       |
| Inferior Temporal Lobe            | B |                | 1732 |       |
| Anterior Cingulum                 | B |                | 110  |       |
| Caudate                           | B |                | 371  |       |
| Hippocampus                       | R |                | 85   |       |
| Parahippocampal Gyrus             | R |                | 92   |       |
| Cluster 2                         |   | -37.5, -69, 45 | 4812 | 8.64  |
| Middle Temporal Lobe              | L |                | 170  |       |
| Superior Parietal Lobe            | L |                | 380  |       |
| Inferior Parietal Lobe            | L |                | 924  |       |
| Angular Gyrus                     | L |                | 2158 |       |
| Middle Occipital Lobe             | L |                | 582  |       |
| Cluster 3                         |   | 40.5, -69, 47  | 4548 | 7.5   |
| Superior Temporal Lobe            | R |                | 77   |       |
| Middle Temporal Lobe              | R |                | 169  |       |
| Superior Parietal Lobe            | R |                | 315  |       |
| Inferior Parietal Lobe            | R |                | 645  |       |
| Angular Gyrus                     | R |                | 2921 |       |
| Superior Occipital Lobe           | R |                | 64   |       |
| Middle Occipital Lobe             | R |                | 170  |       |
| Cluster 4                         |   | 7.5, -51, 30   | 2572 | 7.12  |
| Precuneus                         | B |                | 1399 |       |
| Middle Cingulum                   | B |                | 526  |       |
| Posterior Cingulum                | B |                | 468  |       |
| Cluster 5                         |   | 21, -4.5, 29   | 364  | 4.99  |
| No regions greater than 50 voxels |   |                |      |       |
| Cluster 6                         |   | -20, -9, -20   | 454  | 4.61  |
| Fusiform Gyrus                    | L |                | 138  |       |
| Hippocampus                       | L |                | 152  |       |
| Parahippocampal Gyrus             | L |                | 136  |       |
| Cluster 7                         |   | -21, -96, -12  | 914  | 4.60  |
| Middle Occipital Lobe             | L |                | 255  |       |
| Inferior Occipital Lobe           | L |                | 206  |       |
| Lingual Gyrus                     | L |                | 137  |       |
| Cerebellum                        | L |                | 190  |       |
| Cluster 8                         |   | 24, -85.5, 0   | 1055 | 4.510 |
| Middle Occipital Lobe             | R |                | 303  |       |
| Superior Occipital Lobe           | R |                | 53   |       |
| Inferior Occipital Lobe           | R |                | 407  |       |
| Calcarine                         | R |                | 89   |       |
| Lingual Gyrus                     | R |                | 123  |       |
| Cluster 9                         |   | 30, -51, 18    | 358  | 4.42  |

Regions containing >50 voxels are included in table; B, bilateral; L, left; R, right

**Table S3:** Differences in dorsal anterior cingulate cortex (dACC) connectivity between healthy controls and first-episode psychosis patients.

| Region                   | Hemisphere | x, y, z      | Voxels | Peak t-value |
|--------------------------|------------|--------------|--------|--------------|
| <b>FEP&gt;HC</b>         |            |              |        |              |
| Cluster 1                |            | -48, -51, 23 | 9404   | 5.00         |
| Middle Temporal Lobe     | L          |              | 405    |              |
| Inferior Parietal Lobe   | L          |              | 574    |              |
| Supramarginal Gyrus      | B          |              | 531    |              |
| Angular Gyrus            | L          |              | 440    |              |
| Precuneus                | B          |              | 2821   |              |
| Superior Occipital Lobe  | B          |              | 62     |              |
| Cuneus                   | B          |              | 562    |              |
| Calcarine                | B          |              | 178    |              |
| Middle Cingulum          | B          |              | 372    |              |
| Hippocampus              | B          |              | 107    |              |
| Cluster 2                |            | -20, 48, 23  | 7272   | 4.63         |
| Superior Frontal Lobe    | L          |              | 1226   |              |
| Middle Frontal Lobe      | L          |              | 2114   |              |
| Inferior Frontal Lobe    | L          |              | 1159   |              |
| Orbital Frontal Lobe     | L          |              | 73     |              |
| Precentral Gyrus         | L          |              | 339    |              |
| Superior Temporal Lobe   | L          |              | 209    |              |
| Postcentral Gyrus        | L          |              | 70     |              |
| Anterior Cingulum        | B          |              | 253    |              |
| Rolandic Operculum       | L          |              | 173    |              |
| Insula                   | L          |              | 663    |              |
| Cluster 3                |            | -14, 6, 66   | 2112   | 3.87         |
| Superior Frontal Lobe    | L          |              | 384    |              |
| Middle Frontal Lobe      | L          |              | 84     |              |
| Supplementary Motor Area | B          |              | 1121   |              |
| Cluster 4                |            | 44, 11, -6   | 1638   | 3.74         |
| Insula                   | R          |              | 567    |              |
| Inferior Frontal Lobe    | R          |              | 171    |              |
| Olfactory                | R          |              | 69     |              |
| Superior Temporal Lobe   | R          |              | 148    |              |
| Rolandic Operculum       | R          |              | 317    |              |
| Putamen                  | R          |              | 69     |              |
| Cluster 5                |            | 39, 33, 12   | 1299   | 3.38         |
| Superior Frontal Lobe    | R          |              | 341    |              |
| Middle Frontal Lobe      | R          |              | 536    |              |
| Inferior Frontal Lobe    | R          |              | 184    |              |
| <b>HC&gt;FEP</b>         |            |              |        |              |

Appendix 1 to Overbeek G, Gawne TJ, Reid MA, et al. A multimodal neuroimaging study investigating resting-state connectivity, glutamate and GABA at 7 T in first-episode psychosis. *J Psychiatry Neurosci* 2021.

doi: 10.1503/jpn.210107

Copyright © 2021 The Author(s) or their employer(s).

To receive this resource in an accessible format, please contact us at [cmajgroup@cmaj.ca](mailto:cmajgroup@cmaj.ca).

Online appendices are unedited and posted as supplied by the authors.

|                         |   |            |      |      |
|-------------------------|---|------------|------|------|
| Cluster 1               |   | 26, -86, 0 | 2082 | 3.82 |
| Fusiform Gyrus          | R |            | 125  |      |
| Superior Occipital Lobe | R |            | 173  |      |
| Middle Occipital Lobe   | R |            | 617  |      |
| Inferior Occipital Lobe | R |            | 455  |      |
| Cuneus                  | R |            | 106  |      |
| Lingual Gyrus           | R |            | 308  |      |
| Cerebellum              | R |            | 94   |      |

Regions containing >50 voxels are included in table; B, bilateral; L, left; R, right; HC, healthy control; FEP, first episode psychosis patient

**Table S4:** Relationship between dorsal anterior cingulate cortex (dACC) connectivity and neurochemical levels in healthy controls

| Region                    | Hemisphere | x, y, z       | Voxels | Peak t-value |
|---------------------------|------------|---------------|--------|--------------|
| <b>Glutamate Positive</b> |            |               |        |              |
| Cluster 1                 |            | 9, 30, 29     | 1513   | 5.68         |
| Superior Frontal Lobe     | B          |               | 52     |              |
| Medial Frontal Lobe       | B          |               | 388    |              |
| Anterior Cingulum         | B          |               | 563    |              |
| Middle Cingulum           | B          |               | 349    |              |
| Cluster 2                 |            | -63, 6, 26    | 1805   | 4.82         |
| Inferior Frontal Lobe     | L          |               | 54     |              |
| Precentral Gyrus          | L          |               | 342    |              |
| Superior Temporal Lobe    | L          |               | 347    |              |
| Postcentral               | L          |               | 420    |              |
| Supramarginal Gyrus       | L          |               | 348    |              |
| Cluster 3                 |            | 48, -24, 33   | 1563   | 4.66         |
| Postcentral               | R          |               | 564    |              |
| Supramarginal Gyrus       | R          |               | 486    |              |
| Superior Parietal Lobe    | R          |               | 51     |              |
| Inferior Parietal Lobe    | R          |               | 188    |              |
| Cluster 4                 |            | 3 -84, -36    | 2012   | 3.12         |
| Cerebellum                | B          |               | 950    |              |
| <b>Glutamate Negative</b> |            |               |        |              |
| Cluster 1                 |            | -24, -98, 8   | 2301   | 5.83         |
| Middle Temporal Lobe      | L          |               | 202    |              |
| Angular Gyrus             | L          |               | 908    |              |
| Middle Occipital Lobe     | L          |               | 981    |              |
| Cluster 2                 |            | -35, -84, -35 | 9795   | 5.14         |
| Cerebellum                | B          |               | 8040   |              |
| Lingual                   | B          |               | 126    |              |
| Cluster 3                 |            | -44, -41, -11 | 1591   | 4.67         |
| Middle Temporal Lobe      | L          |               | 55     |              |
| Inferior Temporal Lobe    | L          |               | 429    |              |
| Fusiform Gyrus            | L          |               | 457    |              |
| Parahippocampal gyrus     | L          |               | 145    |              |
| Cerebellum                | L          |               | 139    |              |
| Cluster 4                 |            | -68, -30, -2  | 1707   | 4.57         |

Appendix 1 to Overbeek G, Gawne TJ, Reid MA, et al. A multimodal neuroimaging study investigating resting-state connectivity, glutamate and GABA at 7 T in first-episode psychosis. *J Psychiatry Neurosci* 2021.

doi: 10.1503/jpn.210107

Copyright © 2021 The Author(s) or their employer(s).

To receive this resource in an accessible format, please contact us at [cmajgroup@cmaj.ca](mailto:cmajgroup@cmaj.ca).

Online appendices are unedited and posted as supplied by the authors.

|                         |   |                |      |      |
|-------------------------|---|----------------|------|------|
| Superior Temporal Lobe  | R |                | 527  |      |
| Middle Temporal Lobe    | R |                | 969  |      |
| Inferior Temporal Lobe  | R |                | 149  |      |
| <b>GABA Positive</b>    |   |                |      |      |
| Cluster 1               |   | 14, 59, -8     | 4360 | 6.97 |
| Medial Frontal Lobe     | R |                | 75   |      |
| Orbital Frontal Lobe    | B |                | 505  |      |
| Olfactory               | L |                | 123  |      |
| Anterior Cingulum       | B |                | 844  |      |
| Middle Cingulum         | B |                | 314  |      |
| Amygdala                | L |                | 162  |      |
| Caudate                 | B |                | 184  |      |
| Putamen                 | B |                | 77   |      |
| Hippocampus             | L |                | 82   |      |
| ParaHippocampus         | L |                | 66   |      |
| <b>GABA Negative</b>    |   |                |      |      |
| Cluster 1               |   | -21, -87, 30   | 2180 | 5.00 |
| Middle Temporal Lobe    | L |                | 93   |      |
| Inferior Temporal Lobe  | L |                | 45   |      |
| Superior Parietal Lobe  | L |                | 158  |      |
| Superior Occipital Lobe | L |                | 776  |      |
| Middle Occipital Lobe   | L |                | 647  |      |
| Inferior Occipital Lobe | L |                |      |      |
| Cluster 2               |   | -47, 10.5, -29 | 1482 | 4.80 |
| Superior Temporal Lobe  | L |                | 76   |      |
| Middle Temporal Lobe    | L |                | 498  |      |
| Inferior Temporal Lobe  | L |                | 307  |      |
| Putamen                 | L |                | 124  |      |
| Hippocampus             | L |                | 120  |      |
| Cluster 3               |   | 12, -95, 17    | 2018 | 3.90 |
| Superior Parietal Lobe  | R |                | 84   |      |
| Precuneus               | R |                | 63   |      |
| Calcarine Sulcus        | B |                | 241  |      |
| Superior Occipital Lobe | R |                | 685  |      |
| Middle Occipital Lobe   | R |                | 258  |      |
| Cuneus                  | B |                | 631  |      |

Regions containing >50 voxels are included in table; B, bilateral; L, left; R, right



Appendix 1 to Overbeek G, Gawne TJ, Reid MA, et al. A multimodal neuroimaging study investigating resting-state connectivity, glutamate and GABA at 7 T in first-episode psychosis. *J Psychiatry Neurosci* 2021.

doi: 10.1503/jpn.210107

Copyright © 2021 The Author(s) or their employer(s).

To receive this resource in an accessible format, please contact us at [cmajgroup@cmaj.ca](mailto:cmajgroup@cmaj.ca).

Online appendices are unedited and posted as supplied by the authors.

**Table S5:** Relationship between dorsal anterior cingulate cortex (dACC) connectivity and neurochemical levels in first episode psychosis patients

| Region                    | Hemisphere | x, y, z      | Voxels | Peak t-value |
|---------------------------|------------|--------------|--------|--------------|
| <b>Glutamate Positive</b> |            |              |        |              |
| Cluster 1                 |            | 39, -26, 27  | 5184   | 6.68         |
| Precentral Gyrus          | R          |              | 157    |              |
| Superior Temporal Lobe    | R          |              | 182    |              |
| Rolandic Operculum        | R          |              | 328    |              |
| Inferior Parietal Lobe    | R          |              | 137    |              |
| Supramarginal Gyrus       | R          |              | 1715   |              |
| Postcentral Gyrus         | R          |              | 1139   |              |
| Insula                    | R          |              | 434    |              |
| Cluster 2                 |            | 15, -35, 54  | 10453  | 6.66         |
| Precentral Gyrus          | L          |              | 340    |              |
| Paracentral Lobule        | B          |              | 344    |              |
| Superior Temporal Lobe    | L          |              | 374    |              |
| Heschl's Gyrus            | L          |              | 69     |              |
| Rolandic Operculum        | L          |              | 569    |              |
| Superior Parietal Lobe    | B          |              | 808    |              |
| Inferior Parietal Lobe    | L          |              | 439    |              |
| Postcentral Gyrus         | B          |              | 1914   |              |
| Supramarginal Gyrus       | L          |              | 1133   |              |
| Precuneus                 | B          |              | 1014   |              |
| Middle Cingulum           | B          |              | 566    |              |
| Insula                    | L          |              | 713    |              |
| Thalamus                  | B          |              | 187    |              |
| Putamen                   | L          |              | 59     |              |
| Cluster 3                 |            | 32, -90, 14  | 4010   | 6.27         |
| Superior Occipital Lobe   | R          |              | 724    |              |
| Middle Occipital Lobe     | R          |              | 498    |              |
| Calcarine Sulcus          | B          |              | 1095   |              |
| Cuneus                    | B          |              | 912    |              |
| Lingual Gyrus             | B          |              | 193    |              |
| Cerebellum                | B          |              | 408    |              |
| <b>Glutamate Negative</b> |            |              |        |              |
| Cluster 1                 |            | 21, -3, -9   | 2247   | 5.71         |
| Orbital Frontal Lobe      | R          |              | 71     |              |
| Superior Temporal Lobe    | R          |              | 293    |              |
| Middle Temporal Lobe      | R          |              | 392    |              |
| Insula                    | R          |              | 82     |              |
| Hippocampus               | R          |              | 107    |              |
| Putamen                   | R          |              | 93     |              |
| Pallidum                  | R          |              | 88     |              |
| Cluster 2                 |            | -32, -27, -8 | 13528  | 5.60         |
| Superior Frontal Lobe     | B          |              | 235    |              |
| Middle Frontal Lobe       | L          |              | 219    |              |
| Orbital Frontal Lobe      | B          |              | 1376   |              |
| Rectus                    | B          |              | 995    |              |

Appendix 1 to Overbeek G, Gawne TJ, Reid MA, et al. A multimodal neuroimaging study investigating resting-state connectivity, glutamate and GABA at 7 T in first-episode psychosis. *J Psychiatry Neurosci* 2021.

doi: 10.1503/jpn.210107

Copyright © 2021 The Author(s) or their employer(s).

To receive this resource in an accessible format, please contact us at [cmajgroup@cmaj.ca](mailto:cmajgroup@cmaj.ca).

Online appendices are unedited and posted as supplied by the authors.

|                          |   |             |       |      |
|--------------------------|---|-------------|-------|------|
| Superior Temporal Lobe   | L |             | 575   |      |
| Inferior Temporal Lobe   | L |             | 413   |      |
| Middle Temporal Lobe     | L |             | 2562  |      |
| Fusiform Gyrus           | B |             | 51    |      |
| Precuneus                | B |             | 1104  |      |
| Lingual Gyrus            | B |             | 210   |      |
| Cuneus                   | B |             | 193   |      |
| Calcarine Sulcus         | B |             | 191   |      |
| Middle Cingulum          | B |             | 360   |      |
| Posterior Cingulum       | B |             | 771   |      |
| Insula                   | L |             | 84    |      |
| Hippocampus              | B |             | 467   |      |
| Parahippocampal Gyrus    | B |             | 177   |      |
| Thalamus                 | B |             | 103   |      |
| Cerebellum               | B |             | 173   |      |
| Cluster 3                |   | -8, 59, 42  | 2785  | 5.25 |
| Superior Frontal Lobe    | B |             | 248   |      |
| Medial Frontal Lobe      | B |             | 1667  |      |
| Anterior Cingulum        | B |             | 147   |      |
| Middle Cingulum          | B |             | 146   |      |
| Cluster 4                |   | 62, -60, 20 | 1227  | 5.14 |
| Superior Temporal Lobe   | R |             | 118   |      |
| Middle Temporal Lobe     |   |             | 112   |      |
| Superior Parietal Lobe   | R |             | 251   |      |
| Angular Gyrus            | R |             | 701   |      |
| Cluster 5                |   | 2, 14, 72   | 1550  | 4.63 |
| Superior Frontal Lobe    | B |             | 106   |      |
| Medial Frontal Lobe      | B |             | 162   |      |
| Supplementary Motor Area | B |             | 741   |      |
| <b>GABA Positive</b>     |   |             |       |      |
| Cluster 1                |   | 8, 3, -24   | 1744  | 7.03 |
| Olfactory Bulb           | B |             | 268   |      |
| Parahippocampal Gyrus    | B |             | 146   |      |
| Caudate                  | B |             | 93    |      |
| Cluster 2                |   | -9, -33, 6  | 2080  | 5.33 |
| Posterior Cingulum       | B |             | 593   |      |
| Middle Cingulum          | B |             | 396   |      |
| Precuneus                | B |             | 190   |      |
| Cerebellum               | L |             | 98    |      |
| <b>GABA Negative</b>     |   |             |       |      |
| Cluster 1                |   | 62, 6, 26   | 19538 | 6.94 |
| Middle Frontal Lobe      | L |             | 395   |      |
| Inferior Frontal Lobe    | B |             | 291   |      |
| Orbital Frontal Lobe     | B |             | 279   |      |
| Precentral Gyrus         | B |             | 785   |      |
| Postcentral Gyrus        | B |             | 847   |      |
| Superior Temporal Lobe   | B |             | 1303  |      |
| Middle Temporal Lobe     | R |             | 205   |      |
| Inferior Temporal Lobe   | L |             | 888   |      |
| Heschl's Gyrus           | B |             | 401   |      |
| Rolandic Operculum       | B |             | 1248  |      |

Appendix 1 to Overbeek G, Gawne TJ, Reid MA, et al. A multimodal neuroimaging study investigating resting-state connectivity, glutamate and GABA at 7 T in first-episode psychosis. *J Psychiatry Neurosci* 2021.

doi: 10.1503/jpn.210107

Copyright © 2021 The Author(s) or their employer(s).

To receive this resource in an accessible format, please contact us at [cmajgroup@cmaj.ca](mailto:cmajgroup@cmaj.ca).

Online appendices are unedited and posted as supplied by the authors.

|                         |   |             |      |      |
|-------------------------|---|-------------|------|------|
| Supramarginal Gyrus     | B |             | 1582 |      |
| Insula                  | B |             | 1912 |      |
| Thalamus                | B |             | 747  |      |
| Putamen                 | B |             | 694  |      |
| Caudate                 | B |             | 1026 |      |
| Pallidum                | B |             | 179  |      |
| Cluster 2               |   | 20, -74, 12 | 4833 | 5.29 |
| Superior Occipital Lobe | B |             | 381  |      |
| Middle Occipital Lobe   | B |             | 489  |      |
| Inferior Occipital Lobe | R |             | 238  |      |
| Calcarine               | B |             | 1561 |      |
| Lingual                 | B |             | 737  |      |
| Cuneus                  | B |             | 335  |      |
| Cerebellum              | B |             | 728  |      |
| Cluster 6               |   | -47, 15, 36 | 1433 | 3.83 |
| Middle Frontal Lobe     | L |             | 255  |      |
| Inferior Frontal Lobe   | L |             | 617  |      |
| Precentral Gyrus        | L |             | 502  |      |
| Cluster 7               |   | 57, 11, 14  | 3173 | 3.80 |
| Middle Frontal Lobe     | R |             | 678  |      |
| Inferior Frontal Lobe   | R |             | 1769 |      |
| Precentral Gyrus        | R |             | 453  |      |

Regions containing >50 voxels are included in table; B, bilateral; L, left; R, right

**Table S6:** Differences in the relationship of dorsal anterior cingulate cortex (dACC) connectivity and neurochemicals in healthy controls and first episode psychosis patients

| Region                     | Hemisphere | x, y, z      | Voxels | Peak t-value |
|----------------------------|------------|--------------|--------|--------------|
| <b>FEP&gt;HC Glutamate</b> |            |              |        |              |
| Cluster 1                  |            | 57, -32, 17  | 1418   | 4.55         |
| Superior Temporal Lobe     | R          |              | 299    |              |
| Heschl Gyrus               | R          |              | 52     |              |
| Inferior Parietal Lobe     | R          |              | 78     |              |
| Postcentral Gyrus          | R          |              | 55     |              |
| Supramarginal Gyrus        | R          |              | 515    |              |
| Cluster 2                  |            | 24, -63, 65  | 1499   | 4.41         |
| Superior Parietal Lobe     | R          |              | 290    |              |
| Precuneus                  | B          |              | 1107   |              |
| Cluster 3                  |            | 8, -56, -42  | 3494   | 4.15         |
| Cerebellum                 | B          |              | 3158   |              |
| Cluster 4                  |            | -48, -38, 35 | 1890   | 3.76         |
| Inferior Parietal Lobe     | L          |              | 836    |              |
| Supramarginal Gyrus        | L          |              | 322    |              |
| Angular Gyrus              | L          |              | 258    |              |
| <b>HC&gt;FEP Glutamate</b> |            |              |        |              |
| Cluster 1                  |            | 32, 56, -14  | 2349   | 4.98         |
| Superior Frontal Lobe      | B          |              | 57     |              |
| Middle Frontal Lobe        | R          |              | 81     |              |
| Medial Frontal Lobe        | B          |              | 498    |              |
| Orbital Frontal Lobe       | R          |              | 566    |              |
| Anterior Cingulum          | B          |              | 693    |              |
| Cluster 2                  |            | -24, -41, 26 | 1534   | 4.38         |
| Precuneus                  | B          |              | 127    |              |
| Middle Cingulum            | R          |              | 64     |              |
| Posterior Cingulum         | B          |              | 397    |              |
| Cluster 3                  |            | -2, 12, 66   | 1323   | 4.33         |
| Superior Frontal Lobe      | L          |              | 124    |              |
| Supplementary Motor Area   | B          |              | 1017   |              |
| Cluster 4                  |            | -59, -44, -2 | 1719   | 3.84         |
| Superior Temporal Lobe     | L          |              | 81     |              |
| Middle Temporal Lobe       | L          |              | 1439   |              |
| <b>FEP&gt;HC GABA</b>      |            |              |        |              |
| No significant regions     |            |              |        |              |
| <b>HC&gt;FEP GABA</b>      |            |              |        |              |
| Cluster 1                  |            | 56, -32, 18  | 1704   | 5.47         |
| Superior Temporal Lobe     | R          |              | 286    |              |
| Heschl Gyrus               | R          |              | 101    |              |
| Supramarginal Gyrus        | R          |              | 419    |              |
| Rolandic Operculum         | R          |              | 112    |              |
| Cluster 2                  |            | -18, 18, 9   | 7631   | 5.25         |
| Inferior Frontal Lobe      | L          |              | 114    |              |
| Olfactory                  | B          |              | 84     |              |
| Superior Temporal Lobe     | L          |              | 462    |              |
| Middle Temporal Lobe       | L          |              | 17     |              |
| Heschl Gyrus               | L          |              | 80     |              |

Appendix 1 to Overbeek G, Gawne TJ, Reid MA, et al. A multimodal neuroimaging study investigating resting-state connectivity, glutamate and GABA at 7 T in first-episode psychosis. *J Psychiatry Neurosci* 2021.

doi: 10.1503/jpn.210107

Copyright © 2021 The Author(s) or their employer(s).

To receive this resource in an accessible format, please contact us at [cmajgroup@cmaj.ca](mailto:cmajgroup@cmaj.ca).

Online appendices are unedited and posted as supplied by the authors.

|                    |   |      |
|--------------------|---|------|
| Rolandic Operculum | L | 85   |
| Anterior Cingulum  | B | 435  |
| Middle Cingulum    | B | 226  |
| Insula             | B | 213  |
| Caudate            | B | 1105 |
| Putamen            | B | 421  |
| Pallidum           | B | 99   |
| Thalamus           | L | 210  |

---

Regions containing >50 voxels are included in table; B, bilateral; L, left; R, right; FEP, first episode psychosis; HC, healthy control

Appendix 1 to Overbeek G, Gawne TJ, Reid MA, et al. A multimodal neuroimaging study investigating resting-state connectivity, glutamate and GABA at 7 T in first-episode psychosis. *J Psychiatry Neurosci* 2021.

doi: 10.1503/jpn.210107

Copyright © 2021 The Author(s) or their employer(s).

To receive this resource in an accessible format, please contact us at [cmajgroup@cmaj.ca](mailto:cmajgroup@cmaj.ca).

Online appendices are unedited and posted as supplied by the authors.

**Figure S1:** Relationship between glutamate and dorsal anterior cingulate cortex (dACC) connectivity in healthy controls

Appendix 1 to Overbeek G, Gawne TJ, Reid MA, et al. A multimodal neuroimaging study investigating resting-state connectivity, glutamate and GABA at 7 T in first-episode psychosis. *J Psychiatry Neurosci* 2021.

doi: 10.1503/jpn.210107

Copyright © 2021 The Author(s) or their employer(s).

To receive this resource in an accessible format, please contact us at [cmajgroup@cmaj.ca](mailto:cmajgroup@cmaj.ca).

Online appendices are unedited and posted as supplied by the authors.

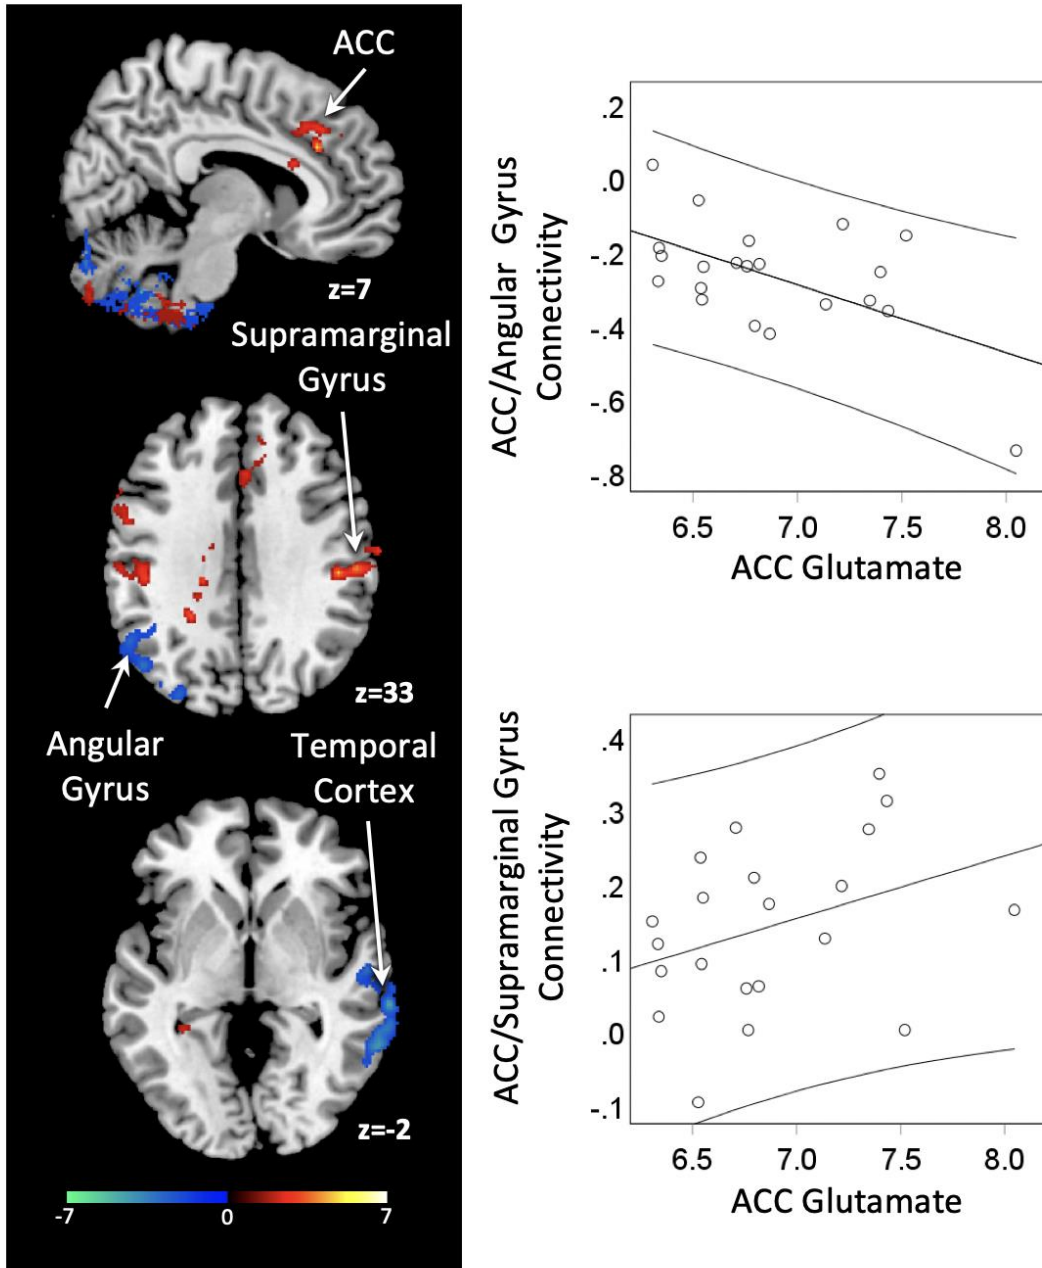

Abbreviations: ACC, anterior cingulate cortex

**Figure S2:** Relationship between glutamate and dorsal anterior cingulate cortex (dACC) connectivity in first episode psychosis patients

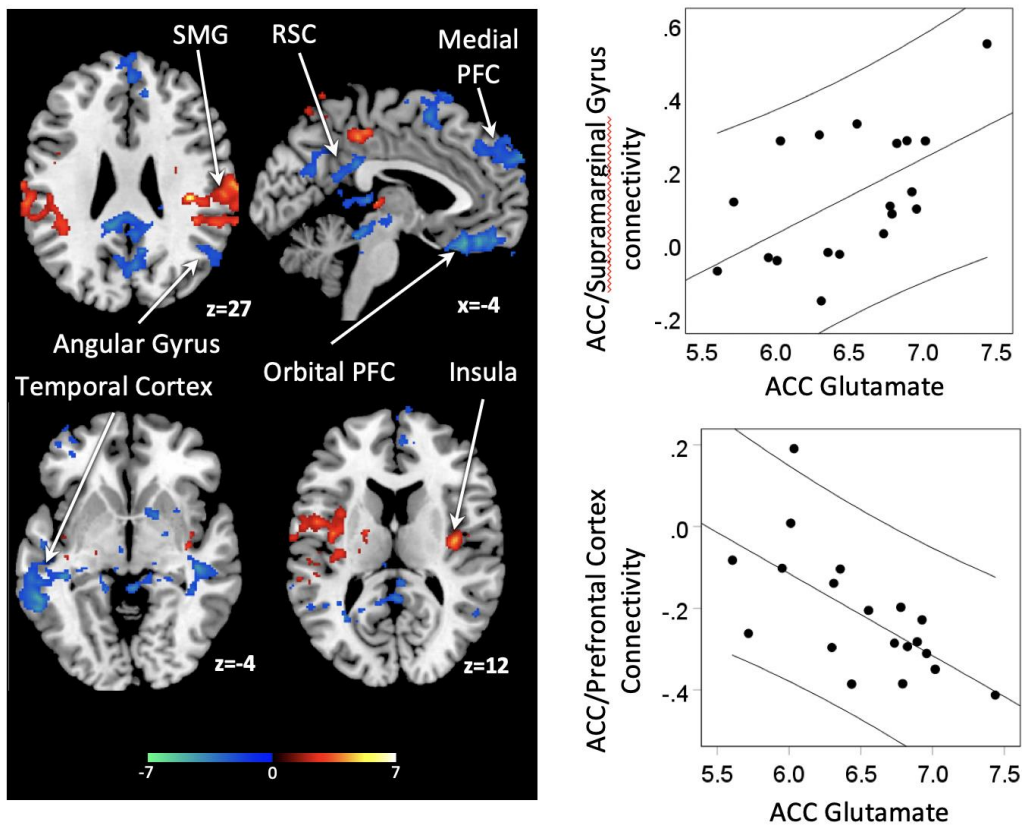

Abbreviations: ACC, anterior cingulate cortex; SMG, supramarginal gyrus; PFC, prefrontal cortex; RSC, retrosplenial cortex



Appendix 1 to Overbeek G, Gawne TJ, Reid MA, et al. A multimodal neuroimaging study investigating resting-state connectivity, glutamate and GABA at 7 T in first-episode psychosis. *J Psychiatry Neurosci* 2021.

doi: 10.1503/jpn.210107

Copyright © 2021 The Author(s) or their employer(s).

To receive this resource in an accessible format, please contact us at [cmajgroup@cmaj.ca](mailto:cmajgroup@cmaj.ca).

Online appendices are unedited and posted as supplied by the authors.

**Figure S3:** Relationship between  $\gamma$ -aminobutyric acid (GABA) and dorsal anterior cingulate cortex (dACC) connectivity in healthy controls

Appendix 1 to Overbeek G, Gawne TJ, Reid MA, et al. A multimodal neuroimaging study investigating resting-state connectivity, glutamate and GABA at 7 T in first-episode psychosis. *J Psychiatry Neurosci* 2021.

doi: 10.1503/jpn.210107

Copyright © 2021 The Author(s) or their employer(s).

To receive this resource in an accessible format, please contact us at [cmajgroup@cmaj.ca](mailto:cmajgroup@cmaj.ca).

Online appendices are unedited and posted as supplied by the authors.

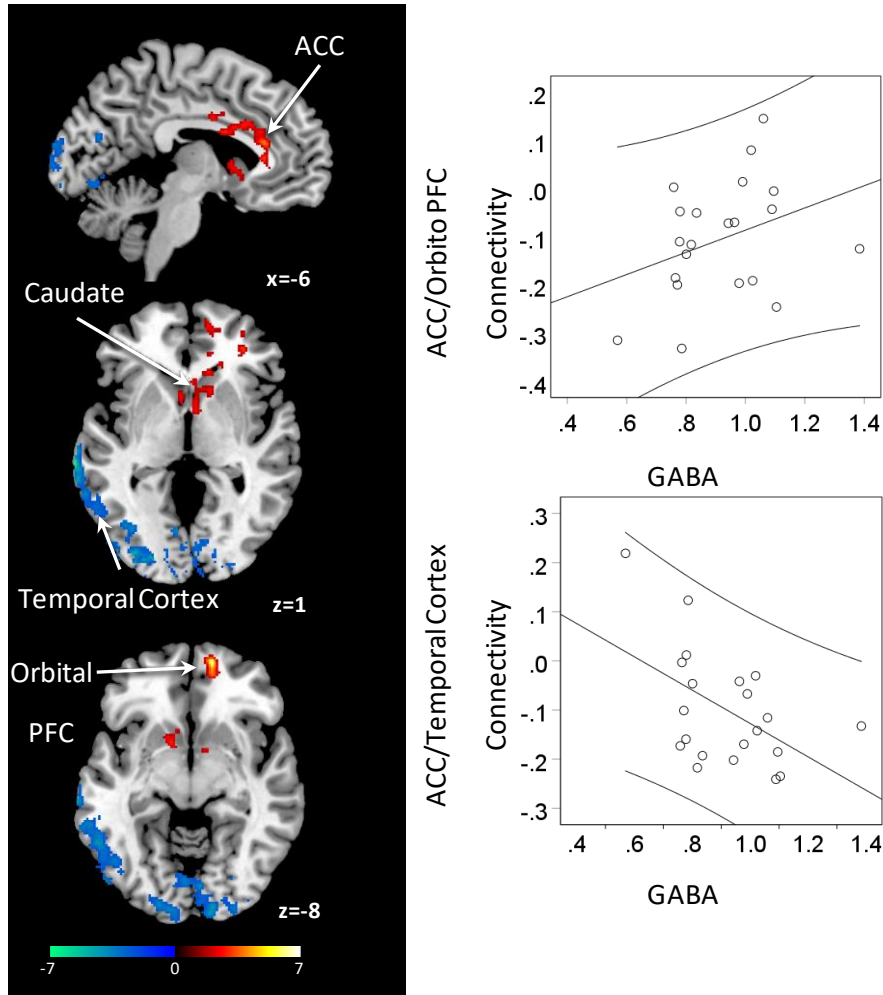

Abbreviations: ACC, anterior cingulate cortex; PFC, prefrontal cortex

Appendix 1 to Overbeek G, Gawne TJ, Reid MA, et al. A multimodal neuroimaging study investigating resting-state connectivity, glutamate and GABA at 7 T in first-episode psychosis. *J Psychiatry Neurosci* 2021.

doi: 10.1503/jpn.210107

Copyright © 2021 The Author(s) or their employer(s).

To receive this resource in an accessible format, please contact us at [cmajgroup@cmaj.ca](mailto:cmajgroup@cmaj.ca).

Online appendices are unedited and posted as supplied by the authors.

**Figure S4:** Relationship between  $\gamma$ -aminobutyric acid (GABA) and dorsal anterior cingulate cortex (dACC) connectivity in first episode psychosis patients

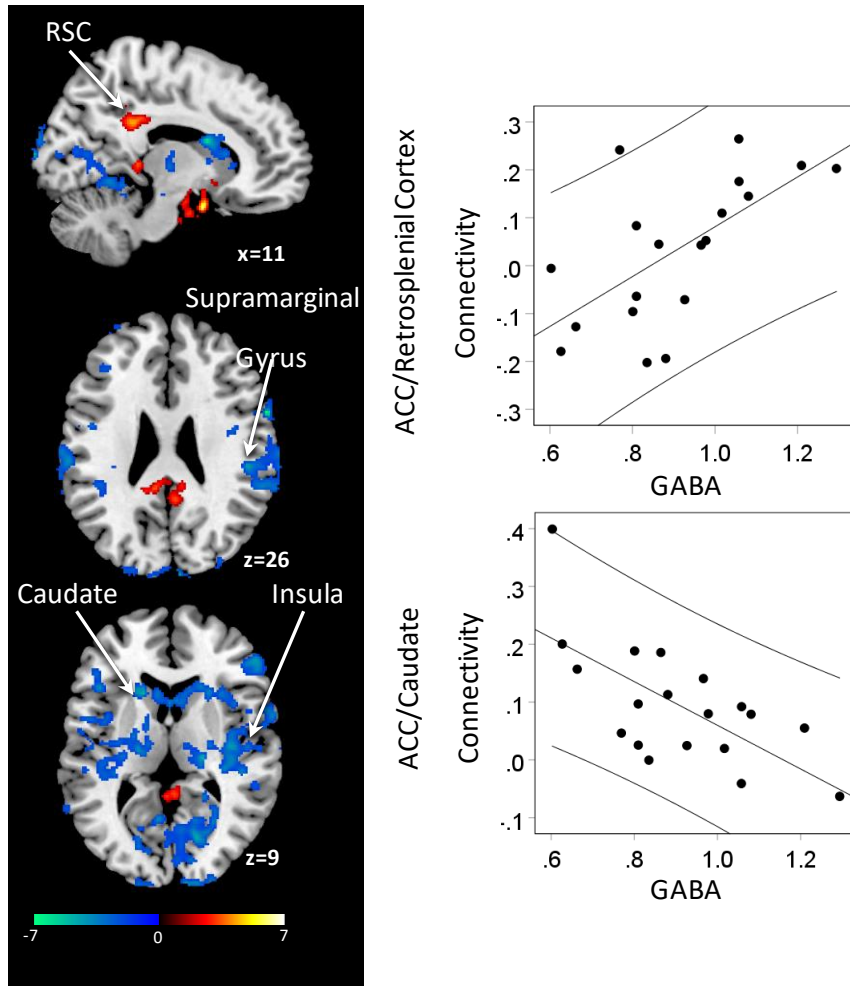

Abbreviations: ACC, anterior cingulate cortex; RSC, retrosplenial cortex
